# Centripetal nuclear shape fluctuations associate with chromatin condensation towards mitosis

Viola Introini<sup>a,b,1</sup>, Gururaj Rao Kidiyoor<sup>c,1</sup>, Giancarlo Porcella<sup>c</sup>, Marco Foiani<sup>c,d</sup>, Pietro Cicuta<sup>a</sup>, and Marco Cosentino Lagomarsino<sup>c,e,2</sup>

<sup>a</sup>Cavendish Laboratory, University of Cambridge, J.J. Thomson Avenue CB3 0HE Cambridge, UK; <sup>b</sup>Cambridge Institute for Medical Research, University of Cambridge, Cambridge Biomedical Campus Keith Peters Building, Hills Rd CB2 0XY Cambridge, UK; <sup>c</sup>IFOM, FIRC Institute of Molecular Oncology, Via Adamello 16, 20139 Milan, Italy; <sup>d</sup>DIPO, Dipartimento di Oncologia ed Emato-oncologia, Università degli Studi di Milano, 20122 Milan, Italy; <sup>e</sup>Dipartimento di Fisica, Università degli Studi di Milano, and I.N.F.N., Via Celoria 16, 20133 Milan, Italy

This manuscript was compiled on November 24, 2021

1 **The cell nucleus plays a central role in several key cellular processes,**  
2 **including chromosome organisation, replication and transcription.**  
3 **Recent work intriguingly suggests an association between nuclear**  
4 **mechanics and cell-cycle progression, but many aspects of this con-**  
5 **nection remain unexplored. Here, by monitoring nuclear shape fluc-**  
6 **tuations at different cell cycle stages, we uncover increasing inward**  
7 **fluctuations in late G2 and early mitosis, which are initially transient,**  
8 **but develop into instabilities that culminate into nuclear-envelope**  
9 **breakdown in mitosis. Perturbation experiments and correlation**  
10 **analysis reveal an association of these processes with chromatin**  
11 **condensation. We propose that the contrasting forces between an**  
12 **extensile stress and centripetal pulling from chromatin condensa-**  
13 **tion could link mechanically chromosome condensation and nuclear-**  
14 **envelope breakdown, the two main nuclear processes during mito-**  
15 **sis.**

Cell Biology | Biological Physics | Cell Mechanics | Nuclear Shape  
Fluctuations | Chromatin

1 **T**he shape fluctuations (also known as flickering) of vesicles  
2 *in vitro*, are driven by thermal motion, to which  
3 the membranes respond passively. Specifically, the observed  
4 transient shape fluctuations can be interpreted in terms of  
5 equilibrium states (1), and their measure by time-lapse mi-  
6 croscopy provides a powerful biophysical tool to characterise  
7 the constituent mechanical properties: parameters such as  
8 bending modulus, tension and viscosities (2). The validity of  
9 these tools, and the assumption of thermal equilibrium, can  
10 extend to some living systems where the action of molecu-  
11 lar motors and other active forces are not relevant, such as  
12 erythrocytes (3, 4).

13 In more complex living systems, chemical energy is turned  
14 into mechanical forces, e.g. by molecular motors, and these  
15 forces add to the thermal forces to induce fluctuations of cells  
16 and cellular compartments (5). In this scenario, the extent  
17 of shape change is related to both the level of non-thermal  
18 (nonequilibrium) activity and to the ‘active’ mechanics. Teas-  
19 ing out these two contributions is very difficult and has been  
20 achieved only in a few cases (6, 7). It requires performing  
21 deformation assays under the presence of a known external  
22 force, and comparing the outcome to the spontaneous deforma-  
23 tions. In a living cell or tissue, the active (ATP-driven) forces  
24 enhance shape fluctuations by non-equilibrium pulling and  
25 stress-relaxation events (e.g. through pumps and cytoskeletal  
26 elements such as actomyosin).

27 Abundant evidence shows that nonequilibrium processes  
28 can drive membrane flickering to more complex behavior than  
29 predicted by thermodynamics equilibrium, for example caus-  
30 ing a breakdown of the “fluctuation-dissipation” theorem valid

at equilibrium (7), which links the decay of spontaneous fluc-  
tuations to the response to external perturbations. In such  
conditions, monitoring shape fluctuations is still useful, but  
the precise identification of biophysical parameters such as  
tension or stiffness is more difficult, and one can generally  
refer to “effective” (or “apparent”) tension and bending moduli  
as a complex byproduct of passive membrane properties and  
the result of active driving forces. In such conditions the  
equilibrium model may still be a useful guide, for example  
allowing to compare the relative amplitudes of fluctuations at  
different wavelengths. In many cases, the active fluctuations  
can be reduced to the standard model with an “effective tem-  
perature”, by which the active forces simply increase the noise  
level with respect to the thermal motion (8).

The cell nucleus shows a complex shape and size dynamics  
during the cell cycle (9–12). It is confined within the nuclear  
envelope (NE), a complex quasi-two-dimensional structure  
comprising two lipid bilayer membranes separated by a peri-  
nuclear space of 20–40 nm and mechanically linked nuclear  
lamina, a 50–80 nm thick network formed by lamins (11). The  
cytoskeleton and chromatin maintain direct links with the NE  
and thus between themselves through the LINC complex and  
other linker proteins. This mechanical coupling of cytoskeleton  
and chromatin enables the transmission of external mechani-  
cal cues across the NE (11) via lamina-associated domains to  
the chromatin, thereby regulating transcriptional activity and

## Significance Statement

The nucleus was recently shown to exhibit shape fluctuations that vary with cell-cycle stage, but we know very little about the possible links between nuclear mechanics and cell cycle-progression. Through flickering analysis, this study monitors radius and nuclear envelope fluctuations across the cell cycle. The authors discover that as the cell cycle progresses towards mitosis, localised inward invaginations of the nuclear shape form initially transiently and gradually increasing their amplitude, in association with chromatin condensation. This phenomenon develops into nuclear envelope breakdown, suggesting a novel link between cell cycle, chromatin mechanics and nuclear shape fluctuations.

G.R.K., M.F., P.C., and M.C.L. conceived research, and together with V.I. designed research; G.R.K. and G.P. performed experiments; V.I. analysed data; G.R.K., V.I., and M.C.L. wrote the manuscript; M.F. and P.C. contributed in reviewing and editing the manuscript.

The authors declare no competing interests.

<sup>1</sup> V.I. (Author One) contributed equally to this work with G.R.K. (Author Two).

<sup>2</sup> To whom correspondence should be addressed. E-mail: Marco.Cosentino-Lagomarsino@ifom.eu

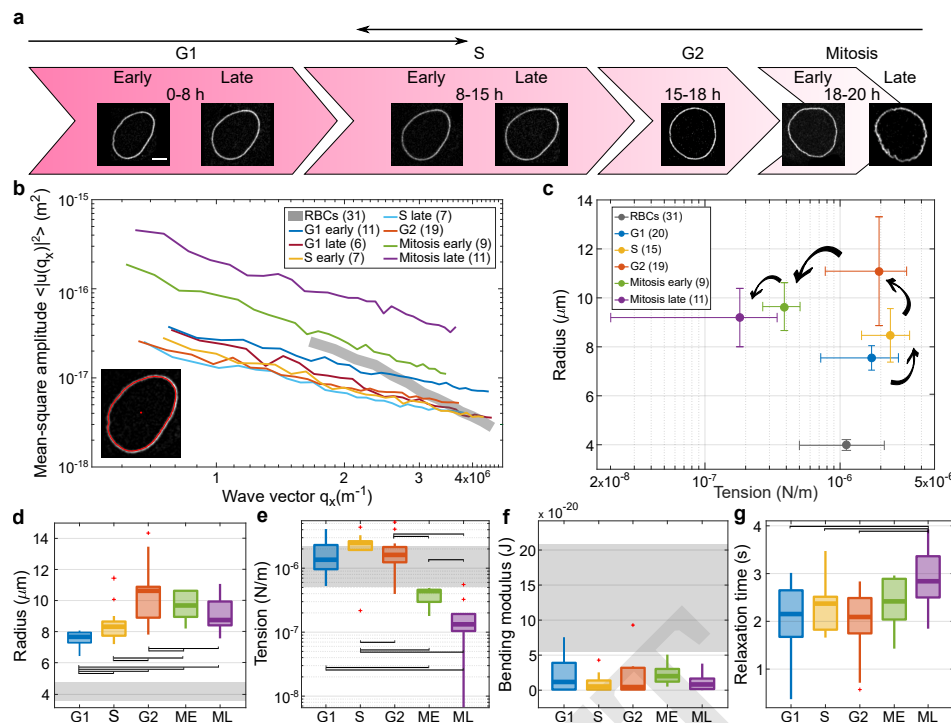

**Fig. 1. Shape fluctuations of HeLa cell nuclei are cell-cycle dependent and increase during mitosis.** (a) Snapshots of a representative nucleus at 7 time points from the start at early G1 phase, throughout S, G2 and mitosis (scale bar 5 μm). Arrowheads indicate the reference time-points to determine cell cycle phase. (b) Average spectra of wave vector-dependent fluctuation amplitudes (modes 6-34) for cells at different stages in the cell cycle. The number of nuclei considered for each cell-cycle stage are reported in the legend in brackets. The fluctuation amplitude  $\langle |u_q|^2 \rangle$  exhibits a decrease with increasing time from G1 until G2, where the fluctuations are reduced by about 3 times. Instead, active nuclear fluctuations during mitosis become 4 times higher in early mitosis (green line) and 10 times in late mitosis (purple line). Inset: contour detection of NE (red line) with fluorescent label Emerin. The initial manual selection of the center (red dot) and an initial point on the NE define the annular region containing the cell boundary used in image analysis. (c) Effective tension vs radius scatterplot shows clusters from different cell-cycle stages forming an open counterclockwise trajectory. (d-f) Box plots of shape-fluctuation parameters throughout the cell cycle (significance indicated). The data show no significant changes (p value > 0.05) in effective bending modulus across the cell cycle, while effective tension increases significantly during S phase and decreases up to one order of magnitude during mitosis. The cell radius increases from the starting point in G1 until G2 and then does not change much. (g) the characteristic relaxation time for mode 3 becomes longer during mitosis. Grey bands and markers represent RBC fluctuation parameters. P values are reported in **SI Table S2**; significant relations are highlighted with brackets.

57 other nuclear processes (13, 14).

58 Recently, Chu and coworkers have monitored nuclear undulations in mammalian cells at timescales of seconds, revealing cell-cycle dependent flickering (15). These undulations are likely actively driven both internally by the nucleus (as evidenced by an increase of undulations upon inhibition of transcription) and externally by the cytoskeleton (evidenced by biochemical perturbations of actomyosin). The authors have hypothesized that regulating flickering may aid and tune nuclear transport through nuclear pores, yet many questions on the connection of cell-cycle dependent nuclear shape fluctuations and cell-cycle progression remain open, in particular regarding a possible role played by nuclear mechanics in the cell cycle itself. Indeed, emerging evidence indicates that in cycling cells both external and internal mechanical forces trigger important changes in nuclear structure, activity and composition (10, 11, 16). Additionally, recent studies show a link between nuclear mechanics and cell cycle progression in cancer cells and epithelia, in particular linking nuclear tension to the G1/S transition (17, 18). Finally, the nucleus was reported to act as a ‘ruler’ in cells moving through constrictions, which rely on nuclear mechano-signalling to modulate forces enabling their passage through restrictive pores (by mechanically coupled signaling of the cPLA2 protein) (19). Intriguingly, cells in G2 appear to have a larger such ruler, hence require less

59 confinement than G1 cells to trigger the contractile response. 60 Consequently, the hypothesis was formulated that these cues 61 could couple the cell mechanical environment to cell-cycle 62 progression. 63

64 Here, we analyse NE fluctuations by high-resolution video 65 microscopy, testing the connection between nuclear mechanics 66 and cell-cycle progression, particularly focusing on the transi- 67 tion from G2 phase to the onset of mitosis, finding increasing 68 transient inwards deformations that associate to chromatin 69 condensation. 70

## 71 Results 72

73 **Nuclear shape fluctuations vary with the cell cycle.** We first 74 tested whether our cells showed a similar cell-cycle dependency 75 of the NE flickering as observed by Chu *et al.* We used a GFP- 76 tagged version of the Emerin protein to mark the NE. Since it 77 is well known that Lamin over-expression can directly impact 78 mechanical properties of the nucleus (20), we decided to use 79 a tagged version of Emerin instead of Lamin to minimise the 80 adverse effects of labeling on nuclear behavior. Analysing the 81 cell cycle duration of the HeLa cells by performing time-lapse 82 videos (see SI) showed that on average, in our growth condi- 83 tions, HeLa cells spent 16.48 hours in interphase and 1.75 hours 84 undergoing mitosis (SI Fig. S1a), consistent with previous 85 reports (21). Nuclear area increased throughout interphase, 86

106 then decreased with entry to mitosis (SI Fig. S1b). Cells  
 107 were arrested at the G1/S transition (by a double thymidine  
 108 block) or at the G2/M transition (by CDK1 inhibition) and  
 109 then released to follow them through cell cycle progression.  
 110 Cell cycle stage was univocally assigned by monitoring the  
 111 cells every 3 hours from release (Fig. 1a).

112 Fig. 1b shows the average fluctuation spectra at different  
 113 stages of cell cycle, i.e., the amplitudes of fluctuations, calcu-  
 114 lated by the deviation of the instantaneous contour from the  
 115 average contour for all the recording frames, and plotted as a  
 116 function of wave vector (inverse wavelength of the projected  
 117 shape deformation) (22). Nuclear fluctuations decrease by  
 118 about three fold from early G1 to late S phase (SI Video  
 119 1), which is in line with data shown by Chu and coworkers  
 120 after 13 hours of release from mitosis arrest (15). However,  
 121 we also report a notable increase of these fluctuations already  
 122 in late G2 and early phases of mitosis, which develops into  
 123 dramatic deformations during mitosis when the cells start to  
 124 round up, eventually developing into an instability triggering  
 125 NE breakdown (SI Video 2, Fig. 1b).

126 Although the system is out of equilibrium, if we assume  
 127 that the active forces play the role of an increased ‘effective  
 128 temperature’ then it is possible to use the standard model for  
 129 fluctuations (15), and extract effective biophysical parameters.  
 130 As anticipated above, it is important to stress that these mea-  
 131 sured effective parameters are not the same as the biophysical  
 132 ones but a byproduct of constitutive parameters and the action  
 133 of active forces. We will refer to these as effective tension and  
 134 bending modulus in the following, and explicitly discuss their  
 135 interpretation whenever necessary.

136 Compared to previous work, we adopted two important  
 137 technical improvements. First, we account for the projection  
 138 of fluctuations on the equator in the measured shape deforma-  
 139 tions (3, 22, 23), which were neglected in Chu *et al.* work and  
 140 lead to erroneous  $q$  dependencies. Second, we consider spectra  
 141 as a function of wave vector rather than wave number, in order  
 142 not to average together fluctuations of different wavelength  
 143 from nuclei of different size. We obtain the average square  
 144 displacement  $\langle u_{q_x}^2 \rangle$ , where the wave vector of the projected  
 145 equatorial profile is  $q_x = 2\pi n/L$ ,  $L$  is the length of the profile  
 146 and  $n = 0, 1, 2, \dots$  the modes (3). Effective bending modulus  
 147 and tension are then obtained by a fit of the spectra with the  
 148 formula

$$149 \quad \langle u_{q_x}^2 \rangle = \frac{k_B T}{2\sigma} \left[ \frac{1}{q_x} - \frac{1}{\sqrt{\frac{\sigma}{\kappa} + q_x^2}} \right], \quad [1]$$

150 where  $\sigma$  is an effective tension (measuring, in the passive  
 151 case, mechanical response to extensile stress) and  $\kappa$  is a  
 152 effective bending rigidity (measuring response to curvature  
 153 in the passive case).  $k_B$  is Boltzmann’s constant, and  $T$   
 154 is the absolute temperature. By taking  $T$  as the physical  
 155 temperature, we interpret any non-equilibrium effect within  
 156 the parameters  $\sigma$  and  $\kappa$ . This seems justified here because the  
 157 mode-dependence of the data is consistent with the equilibrium  
 158 model. Considering an active surface like the NE with this  
 159 model,  $\sigma$  can be interpreted as the resistance of the surface  
 160 to change total area, in response to active and thermal forces,  
 161 and  $\kappa$  as the total energy necessary to bend and ruffle the  
 162 surface. (8, 24).

163 Equation (1) has limiting behaviors  $\langle u_{q_x}^2 \rangle \sim 1/q_x$  for modes  
 164 dominated by effective membrane tension, and  $\langle u_{q_x}^2 \rangle \sim 1/q_x^3$   
 165 for modes dominated by effective bending rigidity. For the

166 range of modes considered in our analysis, the nuclear fluctu-  
 167 ations are mainly affected by effective tension, as the  
 168 mean-square amplitude spectrum is dominated by the  $1/q_x$   
 169 trend (4, 22).

170 It is instructive to plot nuclear radius versus effective ten-  
 171 sion in the different cell-cycle stages (Fig. 1c). Effective  
 172 tension initially increases with radius, as would be expected  
 173 for an “inflated” passive membrane. However, this trend is  
 174 inverted starting from the G2 phase, so that radius keeps  
 175 increasing while effective tension is reduced. The physical  
 176 properties of the lamina may change significantly in this part  
 177 of the cell cycle due to lamin phosphorylation (25, 26), but an  
 178 increase in the active forces could also concomitantly drive  
 179 nuclear shape fluctuations. Hence the decrease in effective  
 180 tension in late G2 and mitosis could be due to a drop in  
 181 physical tension, and/or an effect of active forces. Overall,  
 182 Fig. 1c shows how during the cell cycle the nucleus follows  
 183 a counterclockwise trajectory in the effective tension-radius  
 184 plane, which starts at nucleus birth and culminates in NE  
 185 breakdown at late mitosis. The changes in radius and effective  
 186 tension across phases of cell cycle are statistically significant  
 187 (Fig. 1d-f), while effective bending rigidity, remains fairly  
 188 constant. Looking at cells that were imaged over several stages  
 189 of the cell cycle, we verified which of the average trends of the  
 190 parameters were robust in single cell trajectories (SI Fig. S2).

191 From our measurements, it is possible to monitor the re-  
 192 laxation time scales of the dominant deformation modes. For  
 193 a passive membrane, the modes decay exponentially and the  
 194 relaxation time scale is the ration of the modulus driving the  
 195 relaxation, and the viscosity. When the modulus is determined  
 196 from a passive spectrum, e.g. the tension, then this allows to  
 197 determine the viscosity. However, for an active surface such  
 198 as this one, the time scales reflect active dynamics, and the  
 199 decay of the modes can become very complex. We considered  
 200 the relaxation time  $\tau$  of mode 3, where we found that no com-  
 201 plex behavior appears and the decay is a simple exponential,  
 202 (see SI Fig. S3). Fig. 1g displays longer relaxation time for  
 203 late mitosis. This can be interpreted as a signature of active  
 204 fluctuations/deformations from active nuclear or cytoplasmic  
 205 pulling or pushing elements, visible in the movies during mi-  
 206 tosis, which could trigger different characteristic times (due  
 207 to the dynamics of the active elements) than those of passive  
 208 relaxation.

209 Red blood cell (RBC) fluctuations have been extensively  
 210 studied, representing a simpler well-understood system, yet  
 211 with some common biophysical properties in common with  
 212 cell nuclei (e.g., being supported by cytoskeletal elements).  
 213 Hence, we decided that it could be instructive to use them as  
 214 a reference, and we compared the behavior of HeLa cell nuclei  
 215 with those of RBC (grey bands in Fig. 1). HeLa nuclei have  
 216 in general larger dimensions, a longer relaxation time, and  
 217 smaller effective bending modulus, but their effective tension  
 218 is similar to RBC if we exclude the dramatic changes occurring  
 219 for nuclei at mitosis (3, 4). The mean and SEM of nuclear  
 220 biophysical properties from HeLa cells at different stages of  
 221 the cell cycle are reported in SI Table S1, and p values in  
 222 Table S2.

223 **Calyculin A treatment recapitulates the behavior of nuclear**  
 224 **shape fluctuations during mitosis.** Mitosis is a complex  
 225 mechanochemical process requiring coordinated action from  
 226 multiple cellular components mediated by several kinases and

227 signalling molecules. The cellular shape alterations at the  
 228 beginning of mitosis are accompanied by chromosome con-  
 229 densation and dramatic remodelling of the cortical actin cy-  
 230 toskeleton (12), which eventually lead to NE breakdown. We  
 231 wondered to what extent all these processes could be directly  
 232 linked to nuclear-shape behavior and, particularly what is the  
 233 role of chromatin condensation. This hypothesis would be  
 234 supported if shape-deformation behavior of late-G2 and mit-  
 235 otic nuclei could be reproduced either by inducing chromatin  
 236 condensation or perturbing the actin cytoskeleton. Therefore,  
 237 in order to correlate chromatin dynamics with nuclear shape  
 238 deformations, and to disconnect the shape fluctuations in mit-  
 239 otic cells to mitosis-specific chemical signalling, we treated  
 240 cells with calyculin A, a drug that induces rapid premature  
 241 chromatin condensation in all cells independent of their cell  
 242 cycle (27, 28). Shape fluctuations of calyculin-A treated nuclei  
 243 were recorded and compared with the fluctuations of the same  
 244 cell observed prior to drug treatment (SI Video 3). Next,  
 245 we wanted to understand better the individual contributions  
 246 of condensing chromatin and de-polymerising actin in mitotic  
 247 nuclei shape fluctuation phenomenon. Therefore, we treated  
 248 G2/M arrested cells with actin de-polymerising drug latrun-  
 249 culin A, but in presence of G2/M arresting drug (R3306). This  
 250 allowed us to disrupt actin cytoskeleton without inducing chro-  
 251 matin condensation in late G2 cells, which otherwise would  
 252 have entered into mitosis (SI Video 4).

253 **Fig. 2a** shows that after short exposure to calyculin A  
 254 (20 min) and latrunculin A (25 min), the effective tension of  
 255 nuclei is reduced in a similar fashion to what happens in  
 256 the G2-mitosis transition (G2 phase is the control). A longer  
 257 (50 min) exposure of cells to latrunculin A leaves nuclear radius  
 258 and effective tension constant. Calyculin A instead produces  
 259 within the same treatment time, a subpopulation of cells with  
 260 a further reduction of nuclear radius and a further decrease in  
 261 effective tension, resembling late mitosis. Specifically, **Fig. 2b**  
 262 **and c** compare the radii and effective tension of interphase and  
 263 mitotic nuclei, with the same nuclei before and after treatment  
 264 with calyculin A and latrunculin A.

265 In fact, approximately 10-15 minutes after calyculin A treat-  
 266 ment, nuclei start showing shape fluctuations similar to early-  
 267 stage mitotic nuclei (henceforth termed “early calyculin A”)  
 268 without a major deformation of the nuclear shape. These fluc-  
 269 tuations, within another 2-3 minutes, evolve into widespread  
 270 invaginations as the cells start rounding up (see SI Video  
 271 3). These rounded cells resemble the late stage of mitosis,  
 272 henceforth termed “late calyculin A”, showing significantly  
 273 distorted nuclear shape compared to their untreated state,  
 274 as well as reduced nuclear radius. In practice, since the full  
 275 time lapse was not available for all cells, “early” and “late”  
 276 calyculin A cells were defined based on nuclear radius changes  
 277 compared to pre-treatment pictures (see methods). Nuclei  
 278 included in the latter category show a reduction of radius  
 279 after treatment of at least 10%. Sketches of nuclei in **Fig. 2b**  
 280 report typical changes in nuclear shapes after treatment, and  
 281 further characterisation will be described in **Fig. 3a**. Finally,  
 282 **Fig. 2d** shows that the relaxation time of mode3 increases  
 283 upon calyculin treatment, similarly to mitosis, while it is not  
 284 affected by latrunculin A (data not shown). We found that  
 285 calyculin A treatment recapitulates the behavior of mitotic  
 286 nuclei close to NE breakdown. From this set of data, we con-  
 287 clude that the observed shape fluctuations of mitotic nuclei is

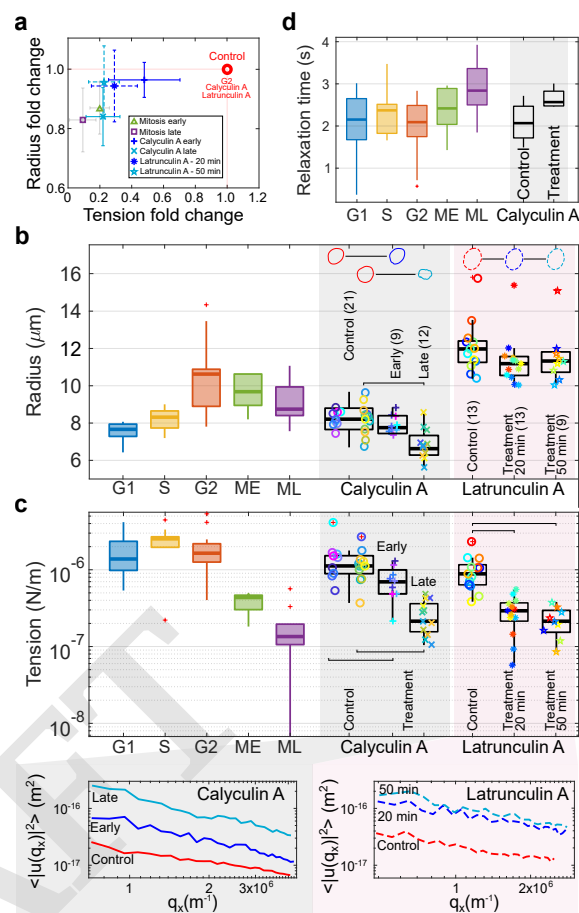

**Fig. 2. Calyculin A and latrunculin A treatments recapitulate the joint radius / effective tension changes found in mitosis.** (a) Radius-tension change after treatments compared to the control phase G2, and early and late mitosis for cycling cells. Calyculin A causes a reduction of both radius and effective tension, while latrunculin A decreases effective tension to a lower value, which remains constant with treatment time (early, 25 min vs late, 50 min). (b-c) Details of radius and tension of the same cells before and after both treatments, compared to the values throughout the cell cycle. Shape changes of representative nuclei are highlighted in panel b. The insets below panel (c) report the respective averaged fluctuation spectra. (d) Relaxation time of mode 3 slightly increases after calyculin treatment, as for mitosis. P values are reported in SI Table S2; significant relations are highlighted with brackets.

mechanically driven by condensing chromatin and cytoskeletal remodelling, therefore mechanical or biochemical signalling triggered at chromatin condensation might be sufficient to generate the nuclear shape remodeling observed before NE breakdown. To address the possible concern that calyculin may affect lamin phosphorylation - which is a signaling part of nuclear envelope breakdown, we performed a Western blot analysis of phospho-Lamin staining in calyculin A treated cells (SI Fig. S4), finding no visible change.

Since calyculin A activates myosin-2 mediated contractility (29), we checked whether the increased centripetal invaginations observed upon treatment with this drug could be a byproduct of increased actomyosin contractility. As a control, we performed a double chemical perturbation with calyculin A and blebbistatin (a myosin inhibitor). Nuclear fluctuations, as well as their radius and effective tension, replicate the nuclear features after treatment with calyculin A. Treatment with blebbistatin alone did not affect the dominance of

306 inwards *vs* outwards fluctuations, and, coherently with previ-  
 307 ous reports (15), increased effective tension (SI Video 5, SI  
 308 Fig. S5). Since blebbistatin is known to be inactivated in blue  
 309 light, we confirmed the result with Y27632 (ROCK inhibitor),  
 310 a rho kinase inhibitor that decreases actomyosin contractility  
 311 and is not affected by illumination (SI Fig. S5). Likely the  
 312 effects of the low illumination used in our experiments on bleb-  
 313 bistatin are mild or absent, and we report identical phenotype  
 314 as in. (15). Taken together, these results support the interpre-  
 315 tation that calyculin-induced nuclear shape deformations are  
 316 not due to increased actomyosin contraction.

317 Finally, we found that actin depolymerization increases  
 318 shape fluctuations, but does not affect nuclear size. Unlike  
 319 calyculin A treated nuclei, nuclei of latrunculin A-treated  
 320 cells develop shape fluctuations within 20 min of treatment,  
 321 resembling the behavior of early mitotic nuclei. However these  
 322 fluctuations do not progress with time into more prominent  
 323 and irreversible invaginations and shape alterations, even after  
 324 50 min of drug treatment (Fig. 2c). The mean and SEM  
 325 of nuclear biophysical properties from cells upon calyculin A  
 326 and latrunculin A perturbations are reported in SI Table S3  
 327 together with their statistically different p values (SI Table  
 328 S2).

329 **Mitotic fluctuations are invaginations mediated by centripetal**  
 330 **pinning forces.** We noticed that most of the transient deforma-  
 331 tions contributing to the decrease in effective tension from G2  
 332 to mitosis had two specific properties: (i) they were localised in  
 333 one region of the observed profiles and (ii) they looked like the  
 334 tip of the deformation pointed towards the inner side of the  
 335 nucleus (SI Video 2). During late mitosis, the deformations  
 336 became more widespread, and increased dramatically their  
 337 asymmetry towards the nucleus center. As the cells progressed  
 338 towards NE breakdown, we observed that the inward deforma-  
 339 tions became increasingly long-lived and less localised, as  
 340 increasingly larger “patches” of the lamina appeared to be  
 341 displaced centripetally. Eventually, these deformations be-  
 342 came unstable, and instead of being restored to an equilibrium  
 343 shape, they developed into the deformations leading to NE  
 344 breakdown. Fig. 3a and b confirm this behavior, which was  
 345 also found in early and late stage calyculin-A treated cells.  
 346 Conversely, latrunculin A treatment does not cause invagina-  
 347 tions, although reducing nuclear effective tension. During late  
 348 mitosis and late stage calyculin A-treated nuclei, invagina-  
 349 tions become wider and deeper (Fig. 3c). Invagination width at  
 350 the maximal deformation increases by 2-3 fold in late mitosis,  
 351 and depth up to 10 fold. Nuclear invaginations from early and  
 352 late phases of calyculin A treatment follow the trend of invagina-  
 353 tions progressing through mitosis in untreated cells, as opposed  
 354 to latrunculin A treatment, where invaginations remain within  
 355 less than 1 $\mu$ m in depth and 25 degrees in width. Depth was  
 356 calculated as the difference between the steady state contour  
 357 and the minimum of the invagination, and the width by the  
 358 points corresponding to 10% of the depth. To characterise  
 359 such inward deformations, we considered the distribution of  
 360 signed shape fluctuations, defined as the integrated difference  
 361 between the profile and a reference profile calculated as the  
 362 average shape of ten frames before the invagination developed  
 363 (Fig. 3d,e). Inward invaginations (< -0.5 $\mu$ , orange band in  
 364 Fig. 3d) are prevalent with respect to outwards (> 0.5 $\mu$ ,  
 365 blue band), shown both in the histograms and relative polar  
 366 plots. Distribution of fluctuations for all frames and angles

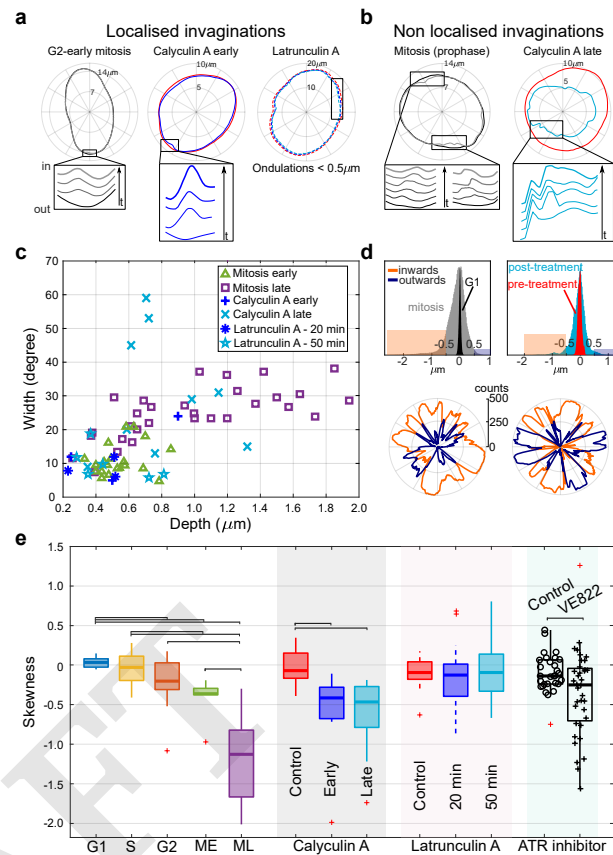

**Fig. 3. Late-G2 and mitotic deformations are dominated by inwards invaginations, compatible with the action of centripetal pinning forces.** (a) Representative examples of the localised inward invaginations that emerge in early mitosis phase and in early stages of calyculin A treatment, but are not found with latrunculin A treatment. (b) Examples of the non-localised invaginations observed in late mitosis and later stages of calyculin A treatment. The insets in panel a and b illustrate the dynamics by snapshots at equal time lags (SI Videos 2-4) (c) Invagination width at the maximal deformation increases by 2-3 fold in late mitosis while depth can increase up to 10 fold. Invaginations from early and late phases of calyculin A treatment resemble the ones in mitosis, while latrunculin A treatment has mild effects on the invaginations (they remain within < 1 $\mu$ m in depth and 25 degrees in width). (d) The histograms (top) as well as polar plots (bottom) of signed shape fluctuations show the bias towards inward motion of mitosis and calyculin A late nuclei (orange are inward and blue outward fluctuations). Histograms count all contour angles for 500 frames; inward fluctuations were considered < -0.5 $\mu$ m (orange band), and outward > 0.5 $\mu$ m (blue band). (e) Boxplots of the skewness of the signed shape fluctuation histograms (shown in panel d) over cell-cycle stages and upon drug treatment. The centripetal asymmetry increases during mitosis and calyculin A treatment, while latrunculin A does not affect it. ATR inhibitor VE822 increases the events with negative skewness. P-values are reported in SI Table S2; significant relations are highlighted with brackets.

are wider for cell mitosis (grey histogram in Fig. 3d) and post-calyculin A treatment (cyan), with respect to interphase (G1 and pre-treatment respectively black and red histograms). Polar plots represent the total number of frames of inward and outward fluctuations at every angle.

To quantify the behavior of inwards *vs* outwards deformations, Fig. 2e uses the skewness of their distribution as summary statistics. A negative skewness corresponds to an enrichment in inward deformations. The results confirm that inward deformations increase in early and late mitosis, as well as upon calyculin A treatment, while it is unaffected by latrunculin A. Incidentally, we noticed that the typical shape of inward deformations fits well the theoretical shape of a mem-

brane deformed by a localised pinning force (30), as reported in **SI Fig. S6**. However, our lack of knowledge of the actual biophysical parameters (bending rigidity and tension) prevents us from using this shape to estimate the magnitude of the pulling forces.

**Chromatin density increases in correspondence to centripetal nuclear shape deformations.** As a last step to gain further insight into a possible role of chromatin in causing the observed centripetal shape fluctuations, we analysed movies of cells in which H2B histones were labelled (with fluorescent m-Cherry) jointly with Emerin (as above). These experiments enabled us to monitor NE shape jointly with chromatin density. We first evaluated whether nuclei in early and late mitosis could exhibit any separation between chromatin and lamina (as proxied by Emerin) at the site of invagination, and we observed no separation for all the cells analyzed (an illustrative example is shown in **(SI Fig. S7)**).

Subsequently, we quantified the cross-correlation between local deformations of NE and fluorescence intensity from histones in the corresponding area during invaginations (examples in **SI Fig. S8, SI Video 8**). We observed that in the neighborhood of invaginations inside the nucleus, while NE contour decreases at the the angle of maximum inward pulling, the mean fluorescence intensity of chromatin increases. This observation clearly establishes a link between chromatin state and nuclear shape deformations in case of local reversible invaginations. In some cases (e.g. the second case reported in **SI Fig. S8**), we saw that the chromatin signal increases a few seconds before the inward NE deformation reaches its maximum extent, suggesting that the local chromatin condensation leads to an increase of fluorescence that occurs before the NE invagination, and possibly pulling the NE itself inward.

**ATR inhibitors increase asymmetric deformations and effective bending modulus, and decrease effective tension.** The ATR signalling protein, a kinase mostly known as an activator of the DNA damage checkpoint, was reported to be a sensor of mechanical stress, to localise at the nuclear envelope and link it to chromatin, and to facilitate release of chromatin from the NE (31). Since ATR inhibition/depletion causes accumulation of NE invaginations attached to semi-condensed chromatin (31, 32), we reasoned that ATR might trigger the relaxation of the invaginations caused by chromatin condensation by releasing chromatin from the NE. Under this hypothesis, symmetry and extent of nuclear flickering in late G2 to mitosis could be affected by ATR inhibition. In line with these assumptions, **Fig. 3e** shows that ATR inhibition causes an increase in the number of deformation showing negative skewness. This change is not observed for all cells, and this could be interpreted as a cell-cycle-dependent effect of ATR inhibition. Indeed, the ATR effect on membrane fluctuations is expected to be variable with the exact cell-cycle stage (not completely controlled in our experiments) and the time window of inhibition. Despite of these limitations in our experiments, our observations are consistent with more long-lasting centripetal invaginations when ATR is inhibited. The same experiments show a mild decrease in effective tension (in line with our hypothesis) and an increase in effective bending modulus (**SI Fig. S9, SI Video 9**). The measured bending modulus increase in ATR inhibited nuclei is a consequence of the drug having opposite effects on the small- $q$  (enhanced)

and high- $q$  (depressed) part of the fluctuation spectrum, and might be the result of a previously reported change in the lipid composition of the NE upon ATR inhibition (32).

## Discussion

**SI Fig. S10 and SI Video 9** report kymographs that summarize all our main results visually. Our results confirm the scenario proposed by Chu and coworkers (15), whereby nuclear shape fluctuations are driven by a combination of thermal motion and forces from chromatin and cytoskeleton. Fully in line with this study, we find that latrunculin A (actin depolymerization) increases shape fluctuations (decreasing effective tension), and decreases nuclear radius, while blebbistatin (Myosin-II inhibition) increases nuclear radius and effective tension. This data suggests that the dynamic flickering of nuclear envelope might be countered by the presence of actin stress fibers (which are lost with latrunculin A), possibly via LINC connections, while the dynamic rearrangement of stress fibers caused by loss of myosin contractility has a more complex “stiffening” effect, which also (surprisingly) leads to radius increase. In addition to this, Chu *et al.* reported that nuclear processes, including transcription and nuclear transport, also influence nuclear shape fluctuations (**Table 1**). Combining the two observations, we confirm the picture of a NE that is a dynamic component rather than a static organelle, which responds to cellular and nuclear events. However, when considering cell-cycle changes, Chu *et al.* only reported a decrease in amplitude of symmetric fluctuations, with the progress of interphase (G1-S-G2). They interpreted this as a change of material properties and/or a reduction of the forces driving the shape fluctuations. While our observations are compatible with this study, we focused on deformations occurring during G2 phase and onset of mitosis, using different perturbations, which lead us to surprising results.

Specifically, after the genome has completed replication, we find evidence supporting active pinning centripetal forces that drive increasingly strong shape fluctuations (also resulting in a drop in effective tension) from G2 to mitosis, up until NE breakdown. Hence, (i) shape fluctuations can dramatically increase from G2 to mitosis, and (ii) they can become highly non-symmetric at this stage. Fluctuation asymmetry favoring in-wards displacements appears already in G2, together with reversible “pinning” centripetal deformations. These deformations become increasingly long lasting and irreversible as the cell cycle progresses towards NE breakdown. Interestingly, neither latrunculin A nor blebbistatin / Y27632 treatments affect the asymmetry of the shape fluctuations, while calyculin A treatment makes them centripetal. These observations suggest that chromatin dynamics can be related to NE centripetal shape fluctuations.

Our data also allow us to formulate some hypotheses on the force balance between the physical processes that regulate nuclear mechanics. Physically, nuclear shape is set by three mechanical components: chromatin, lamins, and the cytoskeleton. Chromatin and lamin A are typically seen as resistive elements that together maintain nuclear shape. Lamins alone, on the contrary, cannot maintain nuclear shape, and the lamina buckles under mechanical stress when it is unsupported by chromatin, suggesting a physical model of the nucleus as a polymeric shell enclosing a stiffer chromatin gel (14). The role of the cytoskeleton is less clear, and sometimes it is pictured

**Table 1. Comparison of nuclear-shape fluctuation behavior before mitosis and under biochemical perturbations.**

| Perturbations        | Biological effect                                                          | Fluctuations   | Implications in shape fluctuations             | Nucleus morphology        | References       |
|----------------------|----------------------------------------------------------------------------|----------------|------------------------------------------------|---------------------------|------------------|
| Mitosis              | Chromatin condensation                                                     | Increase (T&A) | Chromatin and cytoskeletal activity            | More spherical            | This study       |
| Calyculin A          | Induce chromatin condensation                                              | Increase (A)   | Chromatin involvement                          | Spherical and softer      | This study       |
| Latrunculin A        | Inhibition of actin polymerization                                         | Increase (A)   | Cytoskeletal activity                          | Softer                    | This study, (15) |
| $\alpha$ -amanitin   | Inhibition of polymerase II transcriptional activity                       | Increase (T&A) | Chromatin involvement                          |                           | (15)             |
| ATP depletion        | Influence transcription, DNA replication, DNA repair, chromatin remodeling | Decrease (T&A) | Active (> 4 s) and passive (> 1s) fluctuations |                           | (15)             |
| Blebistatin / Y27632 | Inhibition of myosin II activity                                           | Decrease (T&A) | Myosin II activity contribution                | Slightly bigger           | This study, (15) |
| Nocodazole           | Inhibition of microtubule polymerization                                   | Decrease (T&A) | Microtubules contribution                      |                           | (15)             |
| ATR inhibitor        | Reduced release of chromatin-envelope link                                 | Increase (T&A) | Chromatin involvement                          | Invaginations micronuclei | This study, (32) |

Legend: T = thermally driven and A = active. Data from Fig. 1 and 2, and ref. (15).

500 as a compressive force, but a perinuclear actin cap has also  
 501 been shown to stabilize nuclear shape (33). Disconnecting  
 502 chromatin from the inner nuclear membrane results in softer  
 503 nuclei that are deformable and more responsive to cytoskeletal  
 504 forces (13)

505 On the basis of our experiments, we formulate the hypoth-  
 506 esis of a nucleus under extensile and/or stabilizing stress from  
 507 the external cytoskeleton, so that condensing chromatin can  
 508 locally exert inward pulling forces. The calyculin treatment,  
 509 and the direct joint imaging of H2B histones and Emerin  
 510 lead us to surmise that these local pinning forces (becoming  
 511 more widespread as G2 progresses to mitosis) may come from  
 512 condensing chromatin. This hypothesis deviates from the stan-  
 513 dard view whereby a chromatin gel confers structural integrity  
 514 and stiffness to the nucleus, but it does so only in the idea that  
 515 this gel would be under a pre-stressed condition (14). The  
 516 decrease in effective tension under latrunculin A treatment is  
 517 compatible with extensile stress applied by the cytoskeleton.  
 518 Therefore, our data may support a scenario of fairly uniform  
 519 extensile stress applied by the cytoskeleton, counterbalanced  
 520 by local centripetal pulling applied by chromatin.

521 Condensing chromatin exists in mechanically stressed  
 522 state (34). The idea that chromatin condensation could alter  
 523 NE shape by exerting centripetal forces was suggested by pre-  
 524 vious observations on *Drosophila* salivary glands (35), where  
 525 chromatin compaction forces were shown to drive distortions  
 526 of the NE through chromatin-envelope interactions. Kumar  
 527 and coworkers showed that chromatin-envelope interactions  
 528 generate mechanical stress, which recruits and activates ATR  
 529 kinase at the NE (31). In line with their results, we observe a  
 530 more negative skewness in nuclear shape deformations when  
 531 ATR is inhibited near prophase. Additionally, a study on  
 532 non-tumorigenic mammary epithelial cell MCF-10A has impli-  
 533 cated chromatin in nuclear shape deformations, showing that  
 534 these were independent of cytoskeletal connections (36). Chro-  
 535 matin decompaction was also shown to cause nuclear blebbing,  
 536 regardless of lamin, as well as nuclear swelling (37, 38). In  
 537 addition to these findings, our data suggest that the force  
 538 balance at the NE is not static, and the nucleus progressing  
 539 from S phase to G2 and mitosis feels constant or increasing  
 540 extensile stress from the outer cytoskeleton, and increasing

541 localised stress from inner chromatin, affecting its shape fluc-  
 542 tuations. Isotropic contributions to these stresses also likely  
 543 come from forces of osmotic origin (39, 40).

544 The phenomena observed here could play a role in the  
 545 coordination of chromatin condensation and NE breakdown  
 546 during mitosis. It seems natural to think that the timing of  
 547 these two events should be coordinated - just like NE reassem-  
 548 bly should be coordinated with chromosome segregation (10).  
 549 Since the NE is squeezed between the cell cytoskeleton on the  
 550 cytoplasmic side and chromatin on the nucleoplasmic side, and  
 551 both of these active systems undergo major rearrangements  
 552 over the cell cycle, it is possible that the cell-cycle dependent  
 553 flickering may be not only a byproduct but also a driver of  
 554 cell-cycle progression. Since chromatin pulling events deform-  
 555 ing the nucleus develop into widespread invaginations that  
 556 eventually culminate into NE breakdown, we speculate that  
 557 the intensity of the opposed forces on the NE increases dur-  
 558 ing G2 and mitosis, and may be a driver of NE breakdown.  
 559 This could happen in several ways. The centripetal pulling  
 560 by chromatin could mechanically rupture the membrane and  
 561 lamin nuclear surfaces through the exerted forces, or it could  
 562 trigger mechanosensitive signaling cascades, as in the case of  
 563 the cPLA protein (19), leading to downstream events related  
 564 to different aspects of mitosis progression. Chemically, NE  
 565 breakdown is known to be triggered by maturation-promoting  
 566 factor (MPF), which moves into the nucleus and phospho-  
 567 rylates several targets (41, 42), prominently causing lamin  
 568 depolymerization (25, 26, 43). The opening of the nuclear  
 569 membrane is less well understood. Work in starfish indicates  
 570 that it is initiated by loss of the exclusion barrier of nuclear  
 571 pore complexes, followed by NE fenestration (11, 44). Re-  
 572 cently, a mechanical action from the actin cytoskeleton has  
 573 been implicated in these processes (45). Studies applying ex-  
 574 ternal transient tensile stress on the nuclear membrane suggest  
 575 that the force range causing the typical NE deformations are  
 576 sufficient to trigger nuclear membrane rupture (46).

577 Chromatin, through its structure and mechanics, is a key  
 578 factor of nuclear function. Our results highlight that combined  
 579 mechanical and/or mechano-chemical cues from condensing  
 580 chromatin and cytoskeleton could also contribute to the timing  
 581 and the synchronization of NE disruption with chromosome

582 condensation during mitosis.

## 583 Materials and Methods

584

585 **Cell culture, plasmids and transfection.** HeLa cells stably expressing  
586 m-Cherry-H2B (reported previously (31)) were maintained in  
587 DMEM (Dulbecco's Modified Eagle's medium) with GlutaMAX  
588 (Life Technologies) supplemented with 10% (vol/vol) fetal bovine  
589 serum (FBS, Biowest), and penicillin-streptomycin (Microtech), in a  
590 humidified incubator atmosphere at 37 °C and 5% CO<sub>2</sub>.

591 Lipofectamine2000 (Invitrogen) was used for transfecting plas-  
592 mids Emerin pEGFP-C1 (637) plasmid (Addgene ID-61993) into  
593 cells, using the protocol recommended by the manufacturer. The  
594 following day, cells were plated onto fibronectin coated glass cov-  
595 erslips (10 µg/ml; 30 min; at 37 °C). Experiments were performed  
596 about 36-48 hours after transfection).

597 **Drug treatments.** Calyculin A (Cell signaling technology -9902s) and  
598 latrunculin A (Sigma Aldrich-428021) were commercially purchased.  
599 Calyculin A was used at 5 nM and latrunculin A was used at 1  
600 µM concentration. Inhibitors were added to the media during the  
601 experiment, after pre-treatments acquisitions, and were maintained  
602 throughout the course of the experiment. Post calyculin A treat-  
603 ment, we divided the cells into two groups, named "early" and  
604 "late" phases based on their progress in rounding up and subse-  
605 quent radius decrease. Cells with nuclear contour resembling that of  
606 pre-treatment are called early phase calyculin A. Cells with signifi-  
607 cantly lower nuclear radius (at least 10% less than pre-treatment)  
608 and complete deformed contour are defined late stage calyculin  
609 A. These choices are supported by time-lapse videos where the  
610 full development of the drug effect is visible (**SI Video 6**). Cells  
611 becoming rounder during the acquisition were not considered for  
612 further analysis. Latrunculin A was added to cells incubated for  
613 16 hours with Cdk1 inhibitor (RO-3306). Videos were acquired for  
614 about 140s (see below), 20 and 50 minutes after the treatment. Mild  
615 increase in radius of G2-arrested cells compared to the regular G2  
616 (from cell cycle analysis) is due to their prolonged arrest in G2. For  
617 Rho-associated protein kinase (ROCK) inhibition, 10 µM Y27632  
618 inhibitor was administered to cells for 30 min prior to image ac-  
619 quisition (**SI Video 7**). For treatments with blebbistatin, cells were  
620 treated with blebbistatin (Sigma Aldrich) at 5 µM concentration for  
621 45 min inside a dark incubator chamber to avoid photo-inactivation  
622 of the drug, then imaged for 140s. For double treatments with  
623 blebbistatin and calyculin A, cells inside a dark incubator chamber  
624 were first treated with blebbistatin (Sigma Aldrich) at 5 µM con-  
625 centration for 30 min and then treated with calyculin A (15 min)  
626 in presence of blebbistatin, and subsequently imaged for 140s. For  
627 cell cycle synchronisation in the G2-M transition, first cells were  
628 treated with thymidine (2 mM-Sigma Aldrich) for 14 hours, washed  
629 with PBS, released for 7 hours and then incubated further for 16  
630 hours with Cdk1 inhibitor, RO-3306 (Seleckchem-S7747) at 10 µM  
631 concentration. For ATR inhibition experiments (**SI Video 8**), 1  
632 µM of ATR inhibitor VE822 was added 2 hours prior to release  
633 from RO-3306. Cells were kept in the same inhibitor concentration  
634 throughout mitotic progression.

635 **Cell lysis and Immunoblotting.** Cells were lysed with lysis buffer (50  
636 mM Tris-HCl pH 8.0, 1 mM MgCl<sub>2</sub>, 200 mM NaCl, 10% Glycerol,  
637 1% NP-40) supplemented with protease (Roche) and phosphatase  
638 inhibitors (Sigma). Cell lysates boiled with Laemmli buffer were re-  
639 solved using Mini-PROTEAN® (Biorad) precast gels, transferred to  
640 0.45 nitrocellulose membrane, and probed overnight at 4 °C with pri-  
641 mary antibodies against phospho-Lamin A/C (Ser22) (D2B2E from  
642 CST) and vinculin (V9131 from Sigma Aldrich). After washings  
643 with 1X PBS, membranes were incubated with secondary antibodies  
644 for 1 hour at RT and acquired using ChemiDoc imaging system  
645 (Image Lab v5.0).

646 **Imaging and image processing.** Confocal Spinning Disk microscope  
647 (Olympus) equipped with IX83 inverted microscope provided with an  
648 IXON 897 Ultra camera (Andor), Software cellSens Dimension 1.18,  
649 and attached with 100X silicone immersion objective (Refractive  
650 Index = 1.406; Numerical Aperture = 1.35) was used for HeLa

cell imaging. 500 frames were acquired sequentially from Green  
(488 nm) and red (561 nm) channels at a maximum speed with  
individual exposure time of 100 ms (approx. 4 frames per second).  
For cell cycle based analysis, time-points were taken every 3 to  
4-hour interval by acquiring 500 frames of each channel. Each cell  
was imaged for maximum of 5 time-points in a span of 12 hours and  
long-term acquisitions from the same cell was avoided to reduce  
the effect of phototoxicity. Cells were synchronized and released to  
univocally assign their cell cycle stage by monitoring their growth  
along the 12 hours. For treatments, multiple position acquisition  
was used to acquire the same cells at different time-points. Images  
were then processed using the ImageJ software.

Effective bending modulus and tension of the NE were obtained  
by fitting the fluctuation spectrum with Equation 1 for modes 6-34.  
Modes below 5 were excluded because influenced by the cell shape  
(23) and higher modes above 34 were affected by noise due to the  
acquisition exposure time. From fluctuation dynamics, relaxation  
time of mode 3 was obtained by fitting the autocorrelation function  
of the fluctuation amplitudes for mode 3 with a single exponential (3).  
Invaginations were first identified by change in contour fluctuations  
and confirmed by looking at videos. The mean of the contour shape  
for the first 10 frames was subtracted from the contour of each  
frame as reference. The depth is the difference between the steady  
state contour and the minimum of the invagination. The width is  
determined by the points corresponding to 10% of the depth.

**Convention for Fourier transform in the flickering code.** Equation (1)  
is derived in (3) and uses the following non-unitary convention for  
the 2D Fourier transform of the displacement function  $u(\vec{x})$ :

$$u(\vec{x}) = \frac{A}{(2\pi)^2} \int d\vec{q} u_{\vec{q}} e^{i\vec{q}\vec{x}} \quad [2]$$

and the inverse transform is

$$u(\vec{q}) = \frac{1}{A} \int d\vec{x} u_{\vec{x}} e^{-i\vec{q}\vec{x}} \quad [3]$$

where  $A = L \times L$  is the area of the membrane.

In order to match the Fourier transform with the discrete Fourier  
series calculated in Matlab (Fast Fourier Transform, FFT), the  
Fourier coefficients coming out from Matlab's FFT of  $u$  need to be  
corrected by:

$$u_{\vec{q}} = h_{\vec{q}}^{Matlab} \times \frac{\Delta x}{L} \quad [4]$$

$$i.e. h_{\vec{q}}^2 = h_{\vec{q}}^{Matlab} \times \left(\frac{1}{N}\right)^2. \quad [5]$$

**ACKNOWLEDGMENTS.** The authors thank Paolo Maiuri, Gio-  
rgio Scita, Nishit Srivastava and Matthieu Piel for useful feedback on  
this manuscript, and Nils Gauthier for sharing reagents. M.C.L. is  
supported by the Italian Association for Cancer Research (AIRC),  
grant AIRC-IG (REF: 23258). P.C. is supported by the Engineering  
and Physical Sciences Research Council (EPSRC) (EP/R011443/1).  
Work in M.F.'s laboratory was supported by grants from AIRC,  
Telethon-Italy, Ministero dell'Istruzione, dell'Università e della  
Ricerca and the European Commission. V.I. was funded by the  
EPSRC and Sackler scholarships, and by the Wellcome Trust Junior  
Interdisciplinary fellowship. G.R.K. was supported by Marie Curie  
Initial Training Networks (ITN), (FP7 'aDDReSS') fellowship and  
Italian Association for Cancer Research (AIRC) fellowship.

1. Brochard F, Lennon J (1975) Frequency spectrum of the flicker phenomenon in erythrocytes. *J Phys France* 36(11):1035-1047.
2. Helfrich W, Servuss RM (1984) Undulations, steric interaction and cohesion of fluid membranes. *Il Nuovo Cimento D* 3(1):137-151.
3. Yoon YZ, et al. (2009) Flickering analysis of erythrocyte mechanical properties: dependence on oxygenation level, cell shape, and hydration level. *Biophys J* 97(6):1606-1615.
4. Kariuki SN, et al. (2020) Red blood cell tension protects against severe malaria in the Dantu blood group. *Nature* 585(7826):579-583.
5. Caragine CM, Haley SC, Zidovska A (2018) Surface fluctuations and coalescence of nucleolar droplets in the human cell nucleus. *Phys Rev Lett* 121(14):148101.
6. Yoon YZ, Kotar J, Brown AT, Cicuta P (2011) Red blood cell dynamics: from spontaneous fluctuations to non-linear response. *Soft Matter* 7(5):2042-2051.



- 714 7. Mizuno D, Bacabac R, Tardin C, Head D, Schmidt CF (2009) High-resolution probing of cellular force transmission. *Phys. Rev. Lett.* 102(16):168102.
- 715
- 716 8. Ben-Isaac E, et al. (2011) Effective temperature of red-blood-cell membrane fluctuations. *Phys Rev Lett* 106(23):238103.
- 717
- 718 9. Nader GPF, Williard A, Piel M (2021) Nuclear deformations, from signaling to perturbation and damage. *Current Opinion in Cell Biology* 72:137–145.
- 719
- 720 10. Liu S, Pellman D (2020) The coordination of nuclear envelope assembly and chromosome segregation in metazoans. *Nucleus* 11(1):35–52.
- 721
- 722 11. De Magistris P, Antonin W (2018) The dynamic nature of the nuclear envelope. *Curr Biol* 28(8):487–R497.
- 723
- 724 12. Ungricht R, Kutay U (2017) Mechanisms and functions of nuclear envelope remodelling. *Nat Rev Mol Cell Biol* 18(4):229–245.
- 725
- 726 13. Schreiner SM, Koo PK, Zhao Y, Mochrie SGJ, King MC (2015) The tethering of chromatin to the nuclear envelope supports nuclear mechanics. *Nat Commun* 6(1):7159.
- 727
- 728 14. Stephens AD, Banigan EJ, Marko JF (2019) Chromatin's physical properties shape the nucleus and its functions. *Curr Opin Cell Biol* 58:76–84.
- 729
- 730 15. Chu FY, Haley SC, Zidovska A (2017) On the origin of shape fluctuations of the cell nucleus. *PNAS USA* 114(39):10338–10343.
- 731
- 732 16. Nastaly P, et al. (2020) Role of the nuclear membrane protein emerin in front-rear polarity of the nucleus. *Nat Commun* 11(1):2122.
- 733
- 734 17. Uroz M, et al. (2018) Regulation of cell cycle progression by cell–cell and cell–matrix forces. *Nat Cell Biol* 20(6):646–654.
- 735
- 736 18. Aureille J, et al. (2019) Nuclear envelope deformation controls cell cycle progression in response to mechanical force. *EMBO Rep* 20(9):e48084.
- 737
- 738 19. Lomakin AJ, et al. (2020) The nucleus acts as a ruler tailoring cell responses to spatial constraints. *Science* 370(6514):eaba2894.
- 739
- 740 20. Hah J, Kim DH (2019) Deciphering nuclear mechanobiology in laminopathy. *Cells* 8(3):231.
- 741
- 742 21. Cadart C, et al. (2018) Size control in mammalian cells involves modulation of both growth rate and cell cycle duration. *Nat Commun* 9(1):3275.
- 743
- 744 22. Rautu SA, et al. (2017) The role of optical projection in the analysis of membrane fluctuations. *Soft Matter* 13(19):3480–3483.
- 745
- 746 23. Pécéréaux J, Döbereiner HG, Prost J, Joanny JF, Bassereau P (2004) Refined contour analysis of giant unilamellar vesicles. *Eur Phys J E Soft Matter* 13(3):277–290.
- 747
- 748 24. Turlier H, Betz T (2019) Unveiling the active nature of living-membrane fluctuations and mechanics. *Annu Rev Condens Matter Phys* 10(1):213–232.
- 749
- 750 25. Peter M, Nakagawa J, Dorée M, Labbé J, Nigg E (1990) In vitro disassembly of the nuclear lamina and M phase-specific phosphorylation of lamins by cdc2 kinase. *Cell* 61(4):591–602.
- 751
- 752 26. Heald R, McKeon F (1990) Mutations of phosphorylation sites in lamin A that prevent nuclear lamina disassembly in mitosis. *Cell* 61(4):579–589.
- 753
- 754 27. Ono T, Yamashita D, Hirano T (2013) Condensin II initiates sister chromatid resolution during S phase. *J Cell Biol* 200(4):429–441.
- 755
- 756 28. Paulson J, Mause E (2013) Calyculin A induces prematurely condensed chromosomes without histone h1 phosphorylation in mammalian g1-phase cells. *ABC* 03:36–43.
- 757
- 758 29. Fabian L, Troscianczuk J, Forer A (2007) Calyculin A, an enhancer of myosin, speeds up anaphase chromosome movement. *Cell & Chromosome* 6(1):1.
- 759
- 760 30. Derényi I, Jülicher F, Prost J (2002) Formation and interaction of membrane tubes. *Phys Rev Lett* 88(23):238101.
- 761
- 762 31. Kumar A, et al. (2014) Atr mediates a checkpoint at the nuclear envelope in response to mechanical stress. *Cell* 158(3):633 – 646.
- 763
- 764 32. Kidiyoor GR, et al. (2020) ATR is essential for preservation of cell mechanics and nuclear integrity during interstitial migration. *Nat Commun* 11(1).
- 765
- 766 33. Khatau SB, et al. (2009) A perinuclear actin cap regulates nuclear shape. *PNAS USA* 106(45):19017–19022.
- 767
- 768 34. Kleckner N, et al. (2004) A mechanical basis for chromosome function. *PNAS* 101(34):12592–12597.
- 769
- 770 35. Bozler J, Nguyen HQ, Rogers GC, Bosco G (2015) Condensins exert force on chromatin-nuclear envelope tethers to mediate nucleoplasmic reticulum formation in *Drosophila melanogaster*. *G3-Genes Genom Genet* 5(3):341–352.
- 771
- 772 36. Imbalzano KM, et al. (2013) Nuclear shape changes are induced by knockdown of the SWI/SNF ATPase BRG1 and are independent of cytoskeletal connections. *PLoS ONE* 8(2):e55628.
- 773
- 774 37. Stephens AD, et al. (2018) Chromatin histone modifications and rigidity affect nuclear morphology independent of lamins. *Mol Biol Cell* 29(2):220–233.
- 775
- 776 38. Mazumder A, Roopa T, Basu A, Mahadevan L, Shivashankar G (2008) Dynamics of chromatin decondensation reveals the structural integrity of a mechanically prestressed nucleus. *Biophys J* 95(6):3028–3035.
- 777
- 778 39. Mitchison TJ (2019) Colloid osmotic parameterization and measurement of subcellular crowding. *Mol Biol Cell* 30(2):173–180. PMID: 30640588.
- 779
- 780 40. Deviri D, Safran SA (2021) Balance of osmotic pressures determines the volume of the cell nucleus. *bioRxiv*.
- 781
- 782 41. Gallant P, Nigg EA (1992) Cyclin B2 undergoes cell cycle-dependent nuclear translocation and, when expressed as a non-destructible mutant, causes mitotic arrest in HeLa cells. *J Cell Biol* 117(1):213–224.
- 783
- 784 42. Collas P (1999) Sequential PKC- and Cdc2-mediated phosphorylation events elicit zebrafish nuclear envelope disassembly. *J Cell Sci* 112:977–987.
- 785
- 786 43. Ward GE, Kirschner MW (1990) Identification of cell cycle-regulated phosphorylation sites on nuclear lamin C. *Cell* 61(4):561–577.
- 787
- 788 44. Terasaki M, et al. (2001) A new model for nuclear envelope breakdown. *Mol Biol Cell* 12(2):503–510.
- 789
- 790 45. Wesolowska N, et al. (2020) Actin assembly ruptures the nuclear envelope by prying the lamina away from nuclear pores and nuclear membranes in starfish oocytes. *eLife* 9:e49774.
- 791
- 792 46. Zhang Q, et al. (2019) Local, transient tensile stress on the nuclear membrane causes membrane rupture. *Mol Biol Cell* 30(7):899–906.
- 793
- 794
- 795
- 796
